# Supplementary material
Source: HighWire-hosted journal article supplement (https://egastroenterology.bmj.com/content/2/4/e100095)
Supplement: inline-supplementary-material-1 [file inline-supplementary-material-1.pdf]

1 **Supplementary Material**  
 2 **Supplementary table 1. Comparison of clinical characteristics of IPN and sterile**  
 3 **necrotizing pancreatitis**

| Variable                                               | Sterile necrotizing pancreatitis (n=423) | IPN (n=117)      | P value |
|--------------------------------------------------------|------------------------------------------|------------------|---------|
| <b>Demographic data</b>                                |                                          |                  |         |
| Age                                                    | 45 (35–58)                               | 47 (37–58)       | 0.763   |
| Gender (M/F)                                           | 275/148                                  | 77/40            | 0.959   |
| <b>Etiology</b>                                        |                                          |                  |         |
| Biliary                                                | 157 (37.1)                               | 39 (33.3)        | 0.584   |
| Hyperlipidemic                                         | 174 (41.1)                               | 48 (41.0)        |         |
| Alcoholic                                              | 52 (12.3)                                | 14 (12.0)        |         |
| <b>Severity and complications</b>                      |                                          |                  |         |
| APACHE II scores                                       | 9 (5–12)                                 | 11 (8–15)        | <0.001  |
| Marshall scores                                        | 0 (0–1)                                  | 0 (0–2)          | 0.580   |
| SOFA scores                                            | 2 (0–3)                                  | 2 (1–4)          | <0.001  |
| BISAP scores                                           | 1 (0–2)                                  | 2 (2–3)          | <0.001  |
| SIRS                                                   | 224 (53.0)                               | 69 (59.0)        | 0.293   |
| Cardiovascular failure                                 | 36 (8.5)                                 | 40 (34.2)        | <0.001  |
| Renal failure                                          | 54 (12.8)                                | 22 (18.8)        | 0.131   |
| ARDS                                                   | 44 (10.4)                                | 43 (36.8)        | <0.001  |
| Length of ICU stay, day                                | 0 (0–8)                                  | 14 (3–28)        | <0.001  |
| Length of hospital stay, day                           | 14 (10–22)                               | 35 (20–57)       | <0.001  |
| SAP                                                    | 213 (50.4)                               | 99 (84.6)        | <0.001  |
| Death                                                  | 15 (3.5)                                 | 19 (16.2)        | <0.001  |
| <b>Baseline vital sign and laboratory examinations</b> |                                          |                  |         |
| Temperature, °C                                        | 37.0 (36.5–37.7)                         | 37.4 (36.7–38.1) | <0.001  |
| Heart rate, beats/min                                  | 101 (86–116)                             | 117 (100–128)    | <0.001  |

|                                          |                     |                     |        |
|------------------------------------------|---------------------|---------------------|--------|
| Respiratory rate,<br>times/min           | 20 (20–26)          | 24 (20–30)          | 0.013  |
| SBP, mmHg                                | 128 (115–141)       | 124 (108–139)       | 0.079  |
| WBC, $\times 10^9/L$                     | 13.3 (9.7–17.3)     | 12.8 (10.0–17.0)    | 1.000  |
| Blood platelet count,<br>$\times 10^9/L$ | 201.0 (152.5–254.5) | 188.0 (133.0–234.0) | 0.033  |
| hematocrit                               | 41.6 (37.0–46.5)    | 42.8 (37.2–50.3)    | 0.029  |
| Na, mmol/L                               | 136.3 (133.3–139.5) | 136.9 (132.1–140.0) | 0.673  |
| K, mmol/L                                | 4.0 (3.7–4.4)       | 4.2 (3.7–5.0)       | <0.001 |
| Serum total calcium,<br>mmol/L           | 2.04 (1.81–2.22)    | 1.75 (1.51–2.08)    | <0.001 |
| Serum creatinine, $\mu\text{mol/L}$      | 67.5 (53.0–96.6)    | 94.8 (66.0–215.9)   | <0.001 |
| BUN, mmol/L                              | 5.40 (3.90–8.00)    | 8.40 (5.60–13.40)   | <0.001 |
| Serum glucose level,<br>mmol/L           | 9.3 (7.2–13.0)      | 12.5 (8.6–18.7)     | <0.001 |
| GCS score below 15                       | 25 (5.9)            | 20 (17.1)           | <0.001 |
| Positive peritoneal<br>irritation signs  | 84 (19.9)           | 42 (35.9)           | <0.001 |
| <b>Treatment</b>                         |                     |                     |        |
| Endoscopic or<br>interventional drainage | 27 (6.4)            | 82 (70.1)           | <0.001 |
| Surgery                                  | 2 (0.4)             | 14 (12.0)           | <0.001 |

4 Values are median (25th percentile–75th percentile) for continuous variables and  
5 number (%) for categorical variables.

6 AP, acute pancreatitis; ARDS, acute respiratory distress syndrome; BUN, blood urea  
7 nitrogen; GCS, Glasgow coma score; IPN, Infected pancreatic necrosis; ICU, intensive  
8 care unit; K, serum potassium ion concentration; Na, serum sodium ion concentration;  
9 SAP, severe AP; SBP, systolic blood pressure; SIRS, systemic inflammatory response  
10 syndrome; WBC, white blood cell count.

11 **Supplementary table 2. Clinical characteristics comparison between derivation set**  
 12 **and validation set.**

| <b>Variable</b>                   | <b>Derivation set<br/>(n=2103)</b> | <b>Validation set<br/>(n=902)</b> | <b>P value</b> |
|-----------------------------------|------------------------------------|-----------------------------------|----------------|
| <b>Demographic data</b>           |                                    |                                   |                |
| Age                               | 48 (36–62)                         | 48 (36–61)                        | 0.573          |
| Gender (M/F)                      | 1360/743                           | 564/338                           | 0.280          |
| <b>Etiology</b>                   |                                    |                                   |                |
| Biliary                           | 885 (42.1)                         | 361(40.0)                         |                |
| Hyperlipidemic                    | 739 (35.1)                         | 323 (35.8)                        | 0.687          |
| Alcoholic                         | 198 (9.4)                          | 86 (9.5)                          |                |
| <b>Severity and complications</b> |                                    |                                   |                |
| BISAP scores                      | 1 (0–2)                            | 1 (0–2)                           | 0.893          |
| APACHE II scores                  | 8 (5–11)                           | 8 (5–12)                          | 0.120          |
| SOFA scores                       | 2 (0–3)                            | 2 (0–3)                           | 0.373          |
| Marshall scores                   | 0 (0–1)                            | 0 (0–1)                           | 0.219          |
| Length of ICU stay, day           | 0 (0–0)                            | 0 (0–0)                           | 0.001          |
| Length of hospital stay, day      | 8 (5–14)                           | 9 (6–15)                          | 0.001          |
| SAP                               | 494 (23.5)                         | 236 (26.2)                        | 0.022          |
| Death                             | 42 (2.0)                           | 12 (1.3)                          | 0.267          |
| SIRS                              | 671 (31.9)                         | 339 (37.6)                        | 0.003          |
| Cardiovascular failure            | 78 (3.7)                           | 38 (4.2)                          | 0.580          |
| Renal failure                     | 124 (5.9)                          | 54 (6.0)                          | 0.991          |
| ARDS                              | 112 (5.3)                          | 61 (6.8)                          | 0.143          |
| APFC                              | 585 (27.8)                         | 255 (28.3)                        | 0.834          |
| ANC                               | 355 (16.9)                         | 185 (20.5)                        | 0.020          |
| IPN                               | 113 (5.4)                          | 63 (7.0)                          | 0.101          |
| <b>Treatment</b>                  |                                    |                                   |                |
| Endoscopic or interventional      | 123 (5.9)                          | 66 (7.3)                          | 0.151          |

---

drainage

|         |          |          |       |
|---------|----------|----------|-------|
| Surgery | 68 (3.2) | 25 (2.8) | 0.579 |
|---------|----------|----------|-------|

---

13 Values are median (25th percentile–75th percentile) for continuous variables and  
14 number (%) for categorical variables.

15 ANC, acute necrotic collection; AP, acute pancreatitis; APFC, acute peripancreatic fluid  
16 collection; ARDS, acute respiratory distress syndrome; BISAP: Beside Index for  
17 Severity in Acute Pancreatitis; IPN, Infected pancreatic necrosis; ICU, intensive care  
18 unit; SAP, severe AP; SIRS, systemic inflammatory response syndrome.
